# Effectiveness of Water Physical Therapy on Pain, Pressure Pain Sensitivity, and Myofascial Trigger Points in Breast Cancer Survivors: A Randomized, Controlled Clinical Trial

Irene Cantarero-Villanueva, PT, MsC,\*  
Carolina Fernández-Lao, PT, MsC,\*  
César Fernández-de-las-Peñas, PT, PhD,†  
Isabel B. López-Barajas, MD,‡  
Rosario Del-Moral-Ávila, MD,§  
Ana Isabel de la-Llave-Rincón, PT, PhD,† and  
Manuel Arroyo-Morales, PT, MD, PhD\*

\*Department of Physical Therapy, Health Sciences Faculty, Universidad de Granada, Granada;

†Department of Physical Therapy, Occupational Therapy, Rehabilitation and Physical Medicine, Universidad Rey Juan Carlos, Alcorcón;

‡Clinical Oncology Unit, Hospital San Cecilio, Granada;

§Oncology Radiotherapy Service, Hospital Virgen de las Nieves, Servicio Andaluz de Salud. Granada, Spain

*Reprint requests to:* César Fernández-de-las-Peñas, PT, PhD, Facultad de Ciencias de la Salud, Universidad Rey Juan Carlos, Avenida de Atenas s/n, Alcorcón, Madrid 28922, Spain. Tel: +34-91-488-88 84; Fax: +34-91-488-89-57; E-mail: cesar.fernandez@urjc.es.

Conflict of interest: None to declare.

## Abstract

**Objective.** To evaluate the effects of an 8-week water physical therapy program on cervical and shoulder pain, pressure sensitivity, and the presence of trigger points (TrPs) in breast cancer survivors.

**Design.** Randomized, controlled trial.

**Setting.** To date, no study has investigated effects of water therapy in breast cancer.

**Patients.** Sixty-six breast cancer survivors were randomly assigned into two groups: WATER group,

who received a water exercise program or CONTROL group who received the usual care treatment for breast cancer.

**Interventions.** The WATER therapy program consisted of 24 sessions (3 times/week over 8 weeks) of low-intensity exercises in a warm pool (32°C). Each session included 10-minute warm-up period; 35 minutes of aerobic, low-intensity endurance, and core stability training; and a 15-minute cool-down period (stretching and relaxation).

**Outcomes.** Neck and shoulder pain (visual analog scale, 0–100 mm), pressure pain thresholds (PPTs) over C5–C6 zygapophyseal joints, deltoid muscles, second metacarpal, and tibialis anterior muscles, and the presence of TrPs in cervical-shoulder muscles were assessed at baseline and after the 8-week program by an assessor blinded to treatment allocation.

**Results.** The WATER group demonstrated a between-group improvement for neck pain of –31 mm (95% confidence interval [CI] –49 to –22,  $P < 0.001$ ; effect size 1.1, 0.81–1.75) and for shoulder-axillary of –19 mm (–40 to –04,  $P = 0.046$ ; effect size 0.70, 0.14–1.40). Improvements were also noted for PPT levels over C5–C6 joints (between-group differences, affected side: 27.7 kPa, 95% CI 3.9–50.4; unaffected: 18.1 kPa, 95% CI 6.1–52.2). No between-group differences for PPT over the remaining points were observed ( $P > 0.05$ ). Finally, patients in the WATER program showed a greater reduction of active TrPs as compared with the CONTROL group ( $P < 0.05$ ).

**Conclusions.** An 8-week water therapy program was effective for improving neck and shoulder/axillary pain, and reducing the presence of TrPs in breast cancer survivors as compared with usual care; however, no significant changes in widespread pressure pain hyperalgesia were found.

**Key Words.** Breast Cancer; Water; Exercise; Pressure Sensitivity; Pain

## Introduction

Breast cancer is the most common form of cancer in women [1], with an estimated 2 million breast cancer survivors in the United States [2]. Excluding skin cancer, breast cancer is the most common malignancy among women, accounting for nearly one of three cancers diagnosed in women in the United States, and is considered the second leading cause of cancer death among women [3]. The costs of breast cancer are high for society. A case-control study determined that the total average costs of breast cancer was 107,456€/patient, being 89% productivity loss costs and 11% health care costs [4]. Different studies have investigated the incidence and prevalence rates of breast cancer; however, it has been recently reported that incidence rates of breast cancer have been overestimated in the last decade [5,6]. In fact, a recent report has shown that breast cancer mortality has decreased in Europe over the last 25–30 years [7].

Almost all breast cancer survivors exhibit different cancer-related symptoms that impact their quality of life [8]. Among these symptoms, persistent pain after mastectomy has a high prevalence (43%) [9–11]. Additionally, the presence of persistent pain is related to greater rates of depression, lower levels of function, higher cancer-related fatigue, and greater associated symptoms [12,13]. One associated symptom commonly associated with pain is the presence of sensory disturbances (around 50% breast cancer survivors) [14]. In fact, there is evidence suggesting that breast cancer survivors present with changes in nociceptive processing, as mastectomy may enhance the experience of pain by sensitizing the central nervous system due to the nociception originated from damaged small nerve fibers during surgery [15,16]. Recent studies had revealed that breast cancer survivors exhibit widespread pressure hyperalgesia as sign of sensitization of the central nervous system [17] regardless if they received lumpectomy or mastectomy [18]. In these studies, pressure hyperalgesia was related to the presence of active muscle trigger points (TrPs, hypersensitive spots in taut bands in a skeletal muscle that stimulation elicit referred distant pain) [19] indicating that active muscle TrPs spatially increase mechanical sensitivity in breast cancer survivors [17].

As the presence of sensory disturbances after surgery is a predictive factor for persistent pain after breast cancer treatment [20], physical therapy programs should be targeted in decreasing clinical pain and nociceptive gain. There is evidence showing that exercise improves physical function in breast cancer survivors [21]. Nevertheless, a recent meta-analysis found that most published studies have focused on cancer-related fatigue as the main outcome, and most did not include measures of pain or sensory disturbances [22]. A recent study showed that an 8-week multidimensional program including moderate-to-high-intensity strengthening exercises and massage was effective for improving neck and shoulder pain, and reducing pressure pain hyperalgesia in breast cancer survivors as compared with usual care treatment [23]. However, in

clinical practice, it is seen that some breast cancer survivors are not able to practice moderate-high intensity exercises. Therefore, physical therapy practice would benefit from further studies investigating the efficacy of different exercise programs, such as those performed in water, on persistent pain and sensory disturbances in breast cancer survivors.

Water exercise utilizes the principles of hydrostatics and hydrodynamics to create challenges promoting the improvement of health through exercise in water. The unique characteristics of exercising in water may allow people to perform exercises that they would be unable to perform on land [24]. Therefore, these characteristics can help to decrease symptoms because warmth and buoyancy may reduce muscle pain [25] found in breast cancer survivors [17].

To the best of the authors' knowledge, no previous study has investigated the effects of a water physical therapy program on pain and sensory disturbances in breast cancer survivors. Therefore, the aim of this randomized clinical study was to evaluate the effectiveness of an 8-week water physical therapy program, focused on low-intensity exercises, on cervical-shoulder pain, pressure pain hypersensitivity, and the presence of active TrPs in a population of breast cancer survivors.

## Methods

### Participants

Participants were recruited from the Unit of Breast Oncology of the Hospital Virgen de las Nieves and Hospital Clínico San Cecilio, Granada (Spain) from June 2010 to September 2011. Participants were eligible if they: 1) had a diagnosis of breast cancer (stages I–IIIA); 2) had received a simple mastectomy or quadrantectomy with posterior breast reconstruction; 3) between 25 and 65 years; 4) finished their co-adjuvant treatment, except hormone therapy, at least 3 months before beginning the study; 5) not having an active cancer; and, 6) having neck and shoulder pain that began after the breast cancer surgery assessed with a visual analog scale (VAS) (0–100). Neck pain was defined as pain from the occipital to C7 vertebra, not including the shoulder region, whereas shoulder-axillary pain was defined as pain experienced in the shoulder and/or the axillary region, not including the cervical spine. Subjects were excluded if they: 1) were receiving chemotherapy or radiotherapy at the time of the study; 2) suffer from an orthopedic disease that limit to follow the water program; 3) had uncontrolled hypertension (diastolic pressure >95 mm Hg); 4) had presence of lymphoedema; 5) had recurrent cancer; or 6) had previous diagnosis of fibromyalgia [26].

Potential eligible participants were contacted by telephone. Those participants interested were scheduled for appointment where they received a complete explanation of the study and provided informed consent if they agreed

to participate. After inclusion, they were scheduled for a medical visit that included a clinical history, physical examination, and medical screening to determine any condition that justified medical exclusion. The ethical approval for this study was granted by the Ethics Committee of the Hospital Virgen de las Nieves (Granada, Spain).

### *Design, Randomization, and Allocation*

A randomized, controlled clinical trial was conducted. Eligible participants who agreed to participate were randomly assigned into two groups: WATER group who received the water exercise program or CONTROL group who received the usual care treatment for breast cancer. For ethical implications, those participants allocated to the control group, who finished the period of 8 weeks for the current study, were invited to receive the water exercise program. We allocated patients to WATER or CONTROL groups into two randomization cycles using a computer-generated numbers. The sequence was entered into numbered opaque envelopes by an external member, and they were opened after completion of the baseline assessment. Outcome measures were assessed 1 week before and after the intervention by an individual blind to group assignment.

### *Pain Assessment*

The main outcome measures were neck and shoulder/axillary pain intensities. VAS was used to determine the intensity of neck and shoulder-axillary pain. The VAS is a 100-mm line anchored with a 0 at one end representing no pain and 100 at the other end representing the worst pain imaginable [27]. VAS was selected as an outcome measure based on its ability to detect immediate changes with a minimal clinically important difference (MCID) ranging from 9 to 11 mms [28,29].

### *Pressure Pain Sensitivity*

The secondary outcome measure of the current study was pressure pain threshold (PPT), defined as the minimal amount of pressure where a sensation of pressure first changes to pain [30]. It was assessed with an electronic algometer (Somedic AB, Farsta, Sweden). The pressure was applied at approximately a rate of 30 kPa/seconds by a 1-cm<sup>2</sup> probe. Participants were instructed to press the switch when the sensation first changed from pressure to pain. The mean of three trials was calculated for each point and used for the analysis (intraexaminer reliability). A 30-second resting period was allowed between each trial. The reliability of pressure algometry has been found to be high (intra-class correlation coefficient [ICC] 0.91, 95% confidence interval [CI] 0.82–0.97) [31]. PPT was bilaterally assessed over the C5–C6 zygapophyseal joints, deltoid muscles, second metacarpal, and tibialis anterior muscles by an assessor blinded to the allocation of the participants, as described previously [17,18,23].

### *TrP Exploration*

An additional secondary outcome was the presence of active muscle TrPs. TrPs were bilaterally examined in the upper trapezius, the sternocleidomastoid, the levator scapulae, scalene, pectoralis major, and infraspinatus muscles by an assessor who had more than 6 years of experience in the assessment and management of TrPs [23]. TrP diagnosis was performed according to the criteria as described by Simons et al. [19]: 1) presence of a palpable taut band in a skeletal muscle; 2) presence of a hyperirritable spot in the taut band; 3) local twitch response elicited by snapping palpation of the taut band; and 4) presence of referred pain in response to TrP compression. These criteria, when applied by an experienced assessor, have obtained a good interexaminer reliability, with kappa values ranging from 0.84 to 0.88 [32].

TrPs were considered active when both the local and the referred pain evoked by digital compression reproduced any pain symptom, and the patient recognized the pain as familiar. TrPs were considered latent when the local and referred pain elicited did not reproduce any symptom recognized as familiar by the patient [19]. After TrP palpation on each muscle, patients were asked: "When I pressed this muscle, did you feel any pain locally and in other distant area (referred pain). Please tell me whether the pain that you felt during compression reproduces any pain symptom that you are suffering from."

### *Intervention Condition: WATER Exercise Program*

The WATER exercise group trained in a warm pool (32°C), 3 times/week over 8 consecutive weeks (total number of sessions: 24). For this study, we used a deep water pool frequently used for swimming (water temperature: 28–31°C; depth: 1.40 m in the lowest part and 1.80 m in the deepest part). All participants were immersed in water up to the neck. Each 1-hour session included a 10-minute warm-up consisting of slow aerobic, mobility, and stretching exercise; 35 minutes of aerobic, low-intensity endurance, and core stability training; and a 15-minute cool-down period including stretching and relaxation exercises focusing on the neck/shoulder region. The intensity of the training was established following the recommendations of the American College of Sports Medicine and American Heart Association [33]. Participants used the "Borg Rating of Perceived Exertion Scale" for rating their fatigue during the exercise [34]. Progression in the aerobic training was performed throughout the 8 weeks by gradually increasing the intensity and the duration. The program was supervised by two physical therapists with clinical experience in the management of patients with different cancer conditions, and there were 10–12 participants per group. Progression was individualized by a physical therapist with a rate of 4–5 participants for one therapist. Progression of the training is presented in Table 1.

**Table 1** WATER physical therapy program

|                                                                   |                                                                               | Weeks 1–4                                                                                                     | Weeks 5–8                                                                                                       |
|-------------------------------------------------------------------|-------------------------------------------------------------------------------|---------------------------------------------------------------------------------------------------------------|-----------------------------------------------------------------------------------------------------------------|
| Material                                                          |                                                                               | Pool noodles and swimming belt                                                                                | Pool noodles, pull buoy, swimming board                                                                         |
| Aerobic exercise                                                  |                                                                               | Unspecific work during sessions                                                                               | 5–10 minutes of slow aerobic exercise (aqua running or swim) and unspecific work during sessions                |
| Strength exercise                                                 | Main muscle groups                                                            | Dosage and progression                                                                                        | Dosage and progression                                                                                          |
| 1. Bicycling in different body position                           | Hip and knee flexors and extensors, trunk stabilizers                         | Week 1: learning proposal and familiarization with the aquatic environment.                                   | Week 5: 10–12 repetitions × 2 sets                                                                              |
| 2. Flex/extension of elbow/wrist with a correct shoulder position | Scapular stabilizers, shoulder, elbow and wrist flexors, and extensor muscles | Week 2: 10–12 repetitions × 2 sets                                                                            | Week 6: 12–15 repetitions × 2 sets                                                                              |
| 3. Maintain hip and trunk with 90° and legs movements             | Trunk flexors and low-back stabilizers                                        | Week 3: 12–15 repetitions × 2 sets                                                                            | Week 7: 10–12 repetitions × 3 sets                                                                              |
| 4. Hip rotation, ADD-ABD standing                                 | Hip rotators, adductors and abductors                                         | Week 4: 10–12 repetitions × 3 sets                                                                            | Week 8: 10–12 repetitions × 3 sets                                                                              |
| 5. Flex/extension of the shoulder                                 | Shoulder flexors and extensors                                                | Using water resistance. Continue progression between exercises and medium velocity execution exercises        | Increase resistance with materials and positions that require more body control                                 |
| 6. Hip extension with control of low-back position                | Low-back extensors and trunk stabilizers                                      | Increase range of joint motion                                                                                |                                                                                                                 |
| Stretching/relaxation exercises                                   |                                                                               | Pelvic floor, scapular, and low-back stabilizers unspecific work during exercises                             |                                                                                                                 |
|                                                                   |                                                                               | Static self stretching (trapezius, splenius, triceps, deltoid, pectoralis, quadriceps, and hamstring muscles) | Static self stretching (trapezius, splenius, triceps, deltoid, pectoralis, quadriceps, and hamstring muscles)   |
|                                                                   |                                                                               | Self-massage (stroking, kneading, and pressure)                                                               | Couples massage (stroking, kneading, and pressure)                                                              |
|                                                                   |                                                                               | Mobility exercise of the main joints (cervical and lumbar spine, shoulder, hip, knee, and interphalangeal)    | Mobility exercise in pairs of main joints (cervical and lumbar spine, shoulder, hip, knee, and interphalangeal) |
|                                                                   |                                                                               | Breathing exercises (deep and diaphragmatic breathing)                                                        | Breathing exercises (deep and diaphragmatic breathing)                                                          |

ADD-ABD = adduction, abduction of the shoulder.

### Control Condition

Participants followed usual care recommendations by an oncologist in relation to a healthy lifestyle. Breast cancer survivors received a document printable dossier from the oncologist where they found recommendations related to nutrition, lifestyle behaviors, and exercise. A follow-up of the physical activity during the control period was used to control bias detected in previous studies with exercise in cancer survivors [35,36]. For that purpose, we used the

Spanish version of the Minnesota Leisure Time Physical Activity Questionnaire [37].

### Sample Size Calculation

Sample size determination was performed with appropriate software (Tamaño de la Muestra 1.1©, Madrid, Spain). The calculation was based on detecting between-group differences of 11 mm on a 100-mm VAS (i.e., MCID), assuming a standard deviation of 9 [28,29], a two-tailed

*t*-test, an alpha ( $\alpha$ ) level of 0.05, and a desired power of 90%. The estimated desired sample size was calculated to be at least 15 participants per group. To increase the power analysis and to accommodate possible dropouts before the study completion, we duplicated the sample and included a total of 70 participants.

### Statistical Analysis

Statistical analyses were performed using SPSS statistical software, version 17.0 (SPSS, Inc., Chicago, IL, USA), and were conducted according to intention-to-treat analysis principle. Chi-square tests and Student's *t*-tests were used to examine the differences in sociodemographic, medical and clinical features, and PPT levels between the WATER and CONTROL groups. A  $2 \times 2$  mixed-model repeated-measure analysis of variance (ANOVA) with time (pre- and post-intervention) as the within-subject variable and intervention (WATER-CONTROL) as the between-subjects variable was used to examine the effects of the intervention on neck and shoulder/axillary pain. A  $2 \times 3$  mixed-model repeated-measure ANOVA with time (pre- and post-intervention) and side (affected or unaffected) as within-subject factors and intervention (WATER-CONTROL) as between-subjects factor was used to analyze differences in PPT. Separate ANOVAs were done with each outcome as the dependent variable. The main hypothesis of interest was the group  $\times$  time interaction. Intergroup effect sizes were calculated according to the Cohen's *d* statistic [38]. An effect size  $<0.2$  reflects a negligible difference, between  $\geq 0.2$  and  $\leq 0.5$  a small

difference, between  $\geq 0.5$  and  $\leq 0.8$  a moderate difference, and  $\geq 0.8$  a large difference. Finally, mixed chi-square tests (McNemar-Bowker test) were applied to investigate the changes in the distribution of active TrPs between both groups at baseline and after the intervention. A *P* value less than 0.05 was considered statistically significant.

### Results

#### Participants

During the study period (June 2010 to September 2011), 95 women with cancer aged 18–65 completed the oncology treatment in a regional hospital. Seventy patients (73%) were eligible for prescreening, and 66 (94%) agreed to participate and were included in the study (Figure 1). The mean time from breast surgery was  $9 \pm 3$  months. No differences in age, clinical features, pain, PPT levels, and the distribution of TrPs prior to the study existed between the WATER and CONTROL groups (Tables 2–5), so it can be assumed that both groups were comparable in all the outcomes at the beginning of the study.

#### Adherence and Adverse Events of the WATER Physical Therapy Program

A checklist of all sessions was completed by the subjects to determine adherence to the water exercise program. One participant in the WATER program dropped out due to a recurrence of breast cancer during the program. All

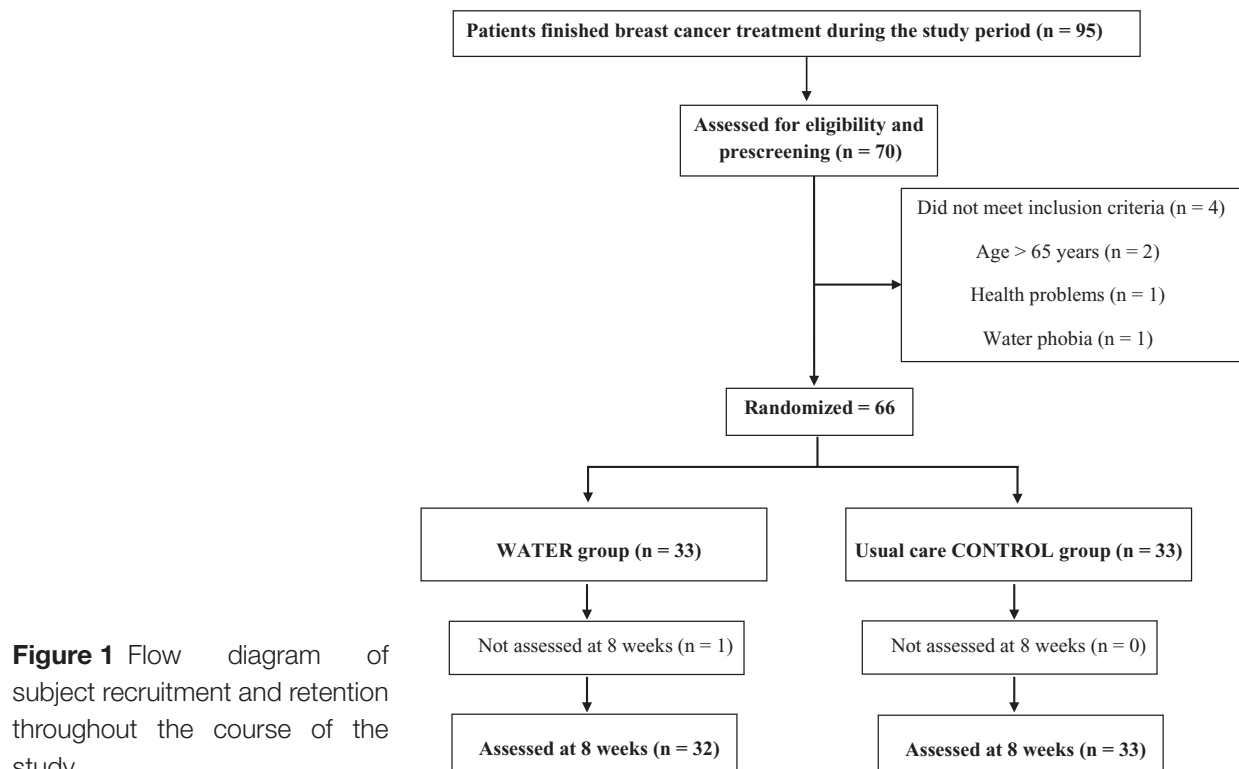

**Figure 1** Flow diagram of subject recruitment and retention throughout the course of the study.



**Table 2** Patient's characteristics and comparisons between both breast cancer survivor groups

| Variable                                     | Water program<br>(N = 33) | Control group<br>(N = 33) | P value |
|----------------------------------------------|---------------------------|---------------------------|---------|
| Age (years), mean (SD)                       | 48 (8)                    | 47 (9)                    | 0.783   |
| Tumor stage, N (%)                           |                           |                           |         |
| I                                            | 16 (48)                   | 17 (51)                   | 0.679   |
| II                                           | 10 (30)                   | 10 (30)                   |         |
| IIIA                                         | 7 (22)                    | 6 (19)                    |         |
| Type of surgery, N (%)                       |                           |                           |         |
| Quadrantectomy                               | 22 (67)                   | 21 (64)                   | 0.851   |
| Mastectomy                                   | 11 (33)                   | 12 (36)                   |         |
| Side of surgery, N (%)                       |                           |                           |         |
| Right (dominant) side                        | 19 (57)                   | 18 (54)                   | 0.804   |
| Left (nondominant) side                      | 14 (43)                   | 15 (46)                   |         |
| Type of treatment, N (%)                     |                           |                           |         |
| Radiation                                    | 1 (3)                     | 1 (3)                     | 0.861   |
| Chemotherapy                                 | 2 (7)                     | 1 (3)                     |         |
| Radiation + chemotherapy                     | 30 (90)                   | 31 (94)                   |         |
| Hormone therapy, N (%)                       |                           |                           |         |
| Antagonist of estrogen receptors (tamoxifen) | 2 (6)                     | 2 (6)                     | 0.802   |
| Aromatase inhibitors (anastrozole)           | 3 (9)                     | 2 (6)                     |         |

P-values for comparisons among group based on chi-square and analysis of variance tests.

SD, standard deviation.

participants within the WATER group completed more than 85% of the 24 water exercise sessions, showing a high adherence rate to the program. Three women reported a transient increase of edema, and four women noted an increase in fatigue immediately after the beginning of the first session, which improved in the next few days. These women did not dropout of the study. No other adverse events were recorded during the study.

#### *Changes in Minnesota Leisure Time Physical Activity Questionnaire*

At the beginning of the study, no significant differences ( $P = 0.466$ ) were found for the Minnesota Leisure Time Physical Activity Questionnaire between groups (water group:  $32.6 \pm 22.8$ ; control group:  $37.1 \pm 20.5$ ). At the

end of the study, the control group did not change its physical activity (score:  $31.4 \pm 25.3$ ,  $P = 0.641$ ), whereas the water exercise group exhibited a statistically significant increase (score:  $63.2 \pm 35.8$ ,  $P < 0.001$ ).

#### *Effects of WATER Physical Therapy in Neck and Shoulder/Axillary Pain*

The ANOVA found a significant group  $\times$  time interaction for the main outcome of the study: neck ( $F = 11.734$ ;  $P < 0.001$ ) and shoulder/axillary ( $F = 4.827$ ;  $P = 0.046$ ) pain; the WATER group experienced a greater decrease in neck and shoulder/axillary pain than the CONTROL group (Table 3). The intergroup effect size was large for neck pain ( $d$  1.1, 95% CI 0.81–1.75) and moderate for shoulder/axillary pain ( $d$  0.7, 95% CI 0.14–1.40).

**Table 3** Pre-intervention, post-intervention, and change scores for neck and shoulder/axillary pain

| Group                  | Pre-intervention | Post-intervention | Within group change scores | Between-group differences |
|------------------------|------------------|-------------------|----------------------------|---------------------------|
| Neck pain              |                  |                   |                            |                           |
| WATER program          | 40 $\pm$ 31      | 12 $\pm$ 15       | –28 (–42, –17)             | –31 (–49, –22)*           |
| Control                | 39 $\pm$ 21      | 42 $\pm$ 23       | 3 (–5, 11)                 |                           |
| Shoulder/axillary pain |                  |                   |                            |                           |
| WATER program          | 27 $\pm$ 33      | 12 $\pm$ 13       | –15 (–29, –10)             | –19 (–40, –4)*            |
| Control                | 38 $\pm$ 35      | 43 $\pm$ 33       | 5 (–1, 19)                 |                           |

\* Significant group  $\times$  time interaction (repeated analysis of variance test,  $P < 0.05$ ).

Values are expressed as mean  $\pm$  standard deviation for pre- and post-intervention data and as mean (95% confidence interval) for within- and between-group change scores.

**Table 4** Pre-intervention, post-intervention, and change scores for pressure pain thresholds

| Group                                | Pre-intervention | Post-intervention | Within group change scores | Between-group differences |
|--------------------------------------|------------------|-------------------|----------------------------|---------------------------|
| C5-C6 zygapophyseal joint affected   |                  |                   |                            |                           |
| WATER program                        | 156.0 ± 65.8     | 174.0 ± 63.5      | 18.0 (3.1, 31.8)           | 27.7 (3.9, 50.4)*         |
| Control                              | 163.4 ± 62.7     | 153.7 ± 49.7      | -9.7 (-29.5, 10.1)         |                           |
| C5-C6 zygapophyseal joint unaffected |                  |                   |                            |                           |
| WATER program                        | 167.4 ± 66.3     | 167.3 ± 62.4      | 0.1 (-18.6, 18.8)          | 18.1 (6.1, 52.2)*         |
| Control                              | 181.9 ± 61.8     | 163.7 ± 54.1      | -18.2 (-50.5, -4.1)        |                           |
| Deltoid muscle affected              |                  |                   |                            |                           |
| WATER program                        | 181.4 ± 76.8     | 206.9 ± 66.8      | 25.5 (1.4, 49.6)           | 6.5 (-35.7, 48.9)         |
| Control                              | 194.6 ± 111.4    | 213.6 ± 69.3      | 19.0 (-19.9, 57.8)         |                           |
| Deltoid muscle unaffected            |                  |                   |                            |                           |
| WATER program                        | 191.6 ± 83.3     | 212.6 ± 61.1      | 21.0 (5.0, 46.9)           | 21.3 (-15.8, 58.4)        |
| Control                              | 223.4 ± 77.7     | 223.1 ± 60.4      | -0.3 (-26.4, 25.7)         |                           |
| Second metacarpal affected           |                  |                   |                            |                           |
| WATER program                        | 210.4 ± 65.9     | 243.8 ± 83.8      | 33.4 (8.3, 58.4)           | 46.1 (5.8, 86.2)          |
| Control                              | 234.4 ± 81.1     | 221.7 ± 66.9      | -12.7 (-46.6, 21.2)        |                           |
| Second metacarpal unaffected         |                  |                   |                            |                           |
| WATER program                        | 242.3 ± 66.3     | 255.2 ± 72.6      | 12.9 (-16.8, 42.7)         | -2.8 (-45.3, 39.6)        |
| Control                              | 233.1 ± 80.9     | 248.8 ± 57.7      | 15.7 (-13.7, 45.2)         |                           |
| Tibialis anterior muscle affected    |                  |                   |                            |                           |
| WATER program                        | 261.2 ± 108.6    | 259.4 ± 82.1      | -1.8 (-41.9, 38.4)         | -20.7 (-75.7, 34.5)       |
| Control                              | 293.3 ± 83.8     | 312.2 ± 88.5      | 18.9 (-15.9, 53.5)         |                           |
| Tibialis anterior muscle unaffected  |                  |                   |                            |                           |
| WATER program                        | 275.4 ± 112.5    | 268.5 ± 101.7     | -6.9 (-49.7, 35.9)         | -21.1 (-78.5, 36.4)       |
| Control                              | 302.9 ± 92.1     | 317.1 ± 75.4      | 14.2 (-19.7, 48.1)         |                           |

\* Significant group × time interaction (repeated analysis of variance test,  $P < 0.05$ ).

Values are expressed as mean ± standard deviation for pre- and post- intervention data and as mean (95% confidence interval) for within- and between-group change scores.

#### Effects of WATER Physical Therapy in Pressure Pain Sensitivity

The intraexaminer repeatability of PPT readings for the points included in the current study ranged from 0.9 to 0.93 for the affected side and from 0.92 to 0.94 for the unaffected side. The standard error of measurement ranged from 6.2 to 7.1 kPa for the affected side and from 5.9 to 6.5 kPa for the unaffected side.

The ANOVA revealed significant group × time interactions for PPT levels over the C5-C6 zygapophyseal joint ( $F = 4.835$ ;  $P = 0.030$ ) but not over the deltoid muscle ( $F = 0.984$ ;  $P = 0.323$ ), second metacarpal ( $F = 3.328$ ;  $P = 0.071$ ), and tibialis anterior muscle ( $F = 1.104$ ;  $P = 0.296$ ). No significant group × time × side interactions for PPT levels over the C5-C6 zygapophyseal joints ( $F = 0.196$ ;  $P = 0.659$ ), deltoid muscle ( $F = 0.275$ ;  $P = 0.601$ ), second metacarpal ( $F = 0.425$ ;  $P = 0.516$ ), and tibialis anterior muscle ( $F = 0.061$ ;  $P = 0.805$ ) were observed. The WATER group experienced bilateral increases in PPT over the cervical spine compared with the CONTROL group (Table 4). The intergroup effect size was large for C5-C6 zygapophyseal joints ( $d = 1.5$ , 95% CI 0.21–2.77) but small for the remaining PPT levels ( $-0.5 < d < 0.11$ ).

#### Effects of WATER Physical Therapy in Active TrPs

The nonparametric McNemar–Bowker test revealed significant changes in the distribution of active TrPs after the intervention for both upper trapezius (affected:  $P = 0.011$ ; unaffected:  $P = 0.042$ ), levator scapulae (affected:  $P = 0.039$ ; unaffected:  $P = 0.048$ ), scalene (affected:  $P = 0.014$ ; unaffected:  $P = 0.001$ ), pectoralis major (affected:  $P = 0.017$ ; unaffected:  $P = 0.021$ ), and infraspinatus (affected:  $P = 0.041$ ; unaffected:  $P = 0.034$ ) but not for the sternocleidomastoid (affected:  $P = 0.737$ ; unaffected:  $P = 0.787$ ) muscles; patients in the WATER exercise program showed a greater reduction of active TrPs as compared with the CONTROL group (Tables 5 and 6). No change in the presence of TrPs was observed in the CONTROL group.

#### Discussion

The current randomized, controlled trial found that an 8-week supervised water physical therapy program focused on low-intensity exercise was effective for improving neck and shoulder/axillary pain and reducing the presence of TrPs in breast cancer survivors as compared with usual care. However, no significant changes in widespread pressure pain hyperalgesia were found.

**Table 5** Distribution of muscle trigger points (TrPs) in breast cancer survivors at baseline

| WATER group (N = 33)   |                        |                  |                            |                  |                         |                  |
|------------------------|------------------------|------------------|----------------------------|------------------|-------------------------|------------------|
|                        | Upper trapezius muscle |                  | Sternocleidomastoid muscle |                  | Levator scapulae muscle |                  |
|                        | Affected side          | Nonaffected side | Affected side              | Nonaffected side | Affected side           | Nonaffected side |
| Active TrPs, N (%)     | 15 (45)                | 19 (58)          | 6 (19)                     | 6 (19)           | 9 (27.5)                | 9 (27.5)         |
| Latent TrPs, N (%)     | 3 (10)                 | 0 (0)            | 3 (10)                     | 3 (10)           | 1 (3)                   | 1 (3)            |
| No TrPs, N (%)         | 15 (45)                | 14 (42)          | 24 (71)                    | 24 (71)          | 23 (69.5)               | 23 (69.5)        |
|                        | Scalene muscle         |                  | Pectoralis major muscle    |                  | Infraspinatus muscle    |                  |
|                        | Affected side          | Nonaffected side | Affected side              | Nonaffected side | Affected side           | Nonaffected side |
| Active TrPs, N (%)     | 15 (45)                | 8 (24)           | 23 (69.5)                  | 3 (10)           | 10 (30)                 | 7 (22)           |
| Latent TrPs, N (%)     | 9 (27.5)               | 6 (19)           | 2 (6.5)                    | 1 (3)            | 2 (6.5)                 | 1 (3)            |
| No TrPs, N (%)         | 9 (27.5)               | 19 (57)          | 8 (24)                     | 29 (87)          | 21 (63.5)               | 25 (75)          |
| CONTROL group (N = 33) |                        |                  |                            |                  |                         |                  |
|                        | Upper trapezius muscle |                  | Sternocleidomastoid muscle |                  | Levator scapulae muscle |                  |
|                        | Affected side          | Nonaffected side | Affected side              | Nonaffected side | Affected side           | Nonaffected side |
| Active TrPs, N (%)     | 16 (49)                | 12 (36)          | 7 (21)                     | 4 (12)           | 15 (45)                 | 11 (33)          |
| Latent TrPs, N (%)     | 2 (6)                  | 2 (6)            | 3 (9)                      | 2 (6)            | 1 (3)                   | 1 (3)            |
| No TrPs, N (%)         | 15 (45)                | 19 (58)          | 23 (70)                    | 27 (82)          | 17 (51)                 | 21 (54)          |
|                        | Scalene muscle         |                  | Pectoralis major muscle    |                  | Infraspinatus muscle    |                  |
|                        | Affected side          | Nonaffected side | Affected side              | Nonaffected side | Affected side           | Nonaffected side |
| Active TrPs, N (%)     | 18 (55)                | 6 (18)           | 21 (63.5)                  | 6 (18)           | 12 (36.5)               | 5 (15)           |
| Latent TrPs, N (%)     | 0 (0)                  | 0 (0)            | 0 (0)                      | 0 (0)            | 0 (0)                   | 0 (0)            |
| No TrPs, N (%)         | 15 (45)                | 27 (72)          | 12 (36.5)                  | 27 (72)          | 21 (63.5)               | 28 (85)          |

In the current study, the effect size for improvement in neck pain (1.1) was large, whereas the improvement in shoulder/axillary pain (0.70) was moderate suggesting a clinically important change. In addition, between-group mean with its 95% CI for difference change score for neck pain surpassed the MCID of 9 and 11 mm [28,29], providing assurance when making clinical decisions regarding the treatment effect of water physical therapy program on this outcome. Similarly, between-group difference change score for shoulder/axillary pain also surpassed the MCID; however, the lower bound of the 95% CI falls within this score, potentially limiting the clinical effect on this outcome. Our results are similar to those previously found by Fernández-Lao et al. [23] who reported that a multimodal physical therapy program including moderate-intensity aerobic and strengthening exercises also decreased neck and shoulder/axillary pain in breast cancer survivors. Nevertheless, the effect of this exercise protocol demonstrated a greater decrease in pain than the current randomized trial. A possible explanation is that the exercise protocol applied by Fernández-Lao et al. [23] included moderate-intensity strengthening [39] exercises and post-session recovery massage, whereas the current study was focused on low-intensity exercises conducted

in water without any recovery post-session intervention. Nevertheless, previous and current evidence suggests that physical therapy is effective for reducing neck and shoulder pain in breast cancer survivors that is highly relevant as 20% of breast cancer survivors usually contact a physician for pain complaints [40].

We also found a small increase in PPT levels, that is, a decrease in pressure pain hypersensitivity over the cervical spine after the water exercise program; however, no changes in the remaining PPT levels were found. This finding would suggest a localized hypoalgesic effect of the program in breast cancer survivors; however, PPT changes over the cervical spine were small. Our results differ from those previously reported by Fernández-Lao et al. who found a generalized hypoalgesic effect as widespread changes in pressure pain sensitivity were observed [23]. It has been postulated that the cause of the exercise-induced hypoalgesia is related to the activation of central inhibitory pain mechanisms. In fact, it seems that exercise-induced hypoalgesia is dependent on the intensity of the exercise [41]. Hoffman et al. determined that an intensity >50% Vo<sup>2</sup> max and a duration >10 minutes are minimum thresholds required for eliciting this exercise-induced anal-



**Table 6** Distribution of muscle trigger points (TrPs) in breast cancer survivors after the intervention

| WATER group (N = 33)   |                        |                  |                            |                  |                         |                  |
|------------------------|------------------------|------------------|----------------------------|------------------|-------------------------|------------------|
|                        | Upper trapezius muscle |                  | Sternocleidomastoid muscle |                  | Levator scapulae muscle |                  |
|                        | Affected side          | Nonaffected side | Affected side              | Nonaffected side | Affected side           | Nonaffected side |
| Active TrPs, N (%)     | 5 (15)                 | 4 (12)           | 1 (3)                      | 0 (0)            | 3 (9)                   | 1 (3)            |
| Latent TrPs, N (%)     | 0 (0)                  | 1 (3)            | 0 (0)                      | 3 (9)            | 0 (0)                   | 1 (3)            |
| No TrPs, N (%)         | 28 (85)                | 28 (85)          | 32 (97)                    | 30 (91)          | 30 (91)                 | 31 (94)          |
|                        | Scalene muscle         |                  | Pectoralis major muscle    |                  | Infraspinatus muscle    |                  |
|                        | Affected side          | Nonaffected side | Affected side              | Nonaffected side | Affected side           | Nonaffected side |
| Active TrPs, N (%)     | 1 (3)                  | 1 (3)            | 7 (21)                     | 1 (3)            | 2 (6)                   | 0 (0)            |
| Latent TrPs, N (%)     | 5 (15)                 | 3 (9)            | 3 (3)                      | 0 (0)            | 0 (0)                   | 0 (0)            |
| No TrPs, N (%)         | 27 (82)                | 29 (88)          | 23 (66)                    | 32 (97)          | 31 (94)                 | 33 (100)         |
| Control group (N = 33) |                        |                  |                            |                  |                         |                  |
|                        | Upper trapezius muscle |                  | Sternocleidomastoid muscle |                  | Levator scapulae muscle |                  |
|                        | Affected side          | Nonaffected side | Affected side              | Nonaffected side | Affected side           | Nonaffected side |
| Active TrPs, N (%)     | 19 (58)                | 12 (35)          | 11 (33)                    | 7 (21)           | 16 (51)                 | 11 (33)          |
| Latent TrPs, N (%)     | 0 (0)                  | 2 (7)            | 5 (16)                     | 4 (12)           | 0 (0)                   | 2 (7)            |
| No TrPs, N (%)         | 14 (42)                | 19 (58)          | 17 (51)                    | 22 (67)          | 17 (49)                 | 20 (60)          |
|                        | Scalene muscle         |                  | Pectoralis major muscle    |                  | Infraspinatus muscle    |                  |
|                        | Affected side          | Nonaffected side | Affected side              | Nonaffected side | Affected side           | Nonaffected side |
| Active TrPs, N (%)     | 15 (45)                | 1 (3)            | 27 (82)                    | 2 (6)            | 16 (49)                 | 11 (33)          |
| Latent TrPs, N (%)     | 2 (6)                  | 0 (0)            | 0 (0)                      | 0 (0)            | 2 (6)                   | 0 (0)            |
| No TrPs, N (%)         | 16 (49)                | 32 (97)          | 6 (18)                     | 31 (94)          | 15 (45)                 | 22 (67)          |

gesia [42]. It is possible that breast cancer survivors included in the water group did not reach this intensity level as the water physical therapy program was focused on low-intensity aerobic exercises. Future studies should investigate the dose–response relationship for different physical therapy programs in breast cancer survivors. Nevertheless, it should be noted that the current study is the first one investigating changes in pressure pain hypersensitivity after the application of water physical therapy in breast cancer survivors.

It has been previously suggested that pain and central sensitization in breast cancer survivors may be related to the presence of active TrPs [17,43]. In the current study, the decrease in neck and shoulder/axillary pain was also accompanied by a reduction in the presence of active TrPs in neck-shoulder muscles in those breast cancer survivors who received the water physical therapy program. In addition, no changes in the presence of active TrPs were found within the control group, supporting that active TrPs is a stable phenomenon in breast cancer survivors if not appropriately treated, as previously suggested [17,23,43]. It should be noted that in the current study, the decrease in the presence of active TrPs was not related to changes in pressure pain sensitivity, which may be related

to the hypothesis that active muscle TrPs can be more involved in the genesis of pain rather than in changes in sensory process in breast cancer survivors.

Finally, we should recognize the potential strengths and limitation of the current randomized, controlled clinical trial. Strengths of the current trial include a structured water physical therapy program supervised by skilled physical therapist, objective outcomes, intention-to-treat analyses, and group therapy; however, we should recognize its limitations. The first limitation is that the entire sample was recruited from one oncology center perhaps limiting the extrapolation of the results. The second weakness of this study was that the control group was allowed to freely practice physical activity. The possible bias associated with this was controlled as our control group did not show significant increases in physical activity during the study as identified by the Minnesota Leisure Time Physical Activity Questionnaire [35,36]. Additionally, we did not control factors such as time spent with a therapist and patient expectations for improvement in the control condition. A third possible weakness is that we only assessed short-term effects of water exercise program. Future studies should investigate long-term effect of physical therapy programs in

sensory disturbances and pain observed in breast cancer survivors.

## Conclusions

An 8-week water physical therapy program using low-intensity exercise and stretching exercises was effective for improving neck and shoulder/axillary pain and reducing the presence of TrPs in breast cancer survivors as compared with usual care. No significant changes in widespread pressure pain hyperalgesia were found. Our results support that physical therapy interventions may be clinically useful for avoiding persistent pain and sensory disturbances in breast cancer survivors. Future studies are needed to determine the long-term effects of physical therapy in sensory disturbances in patients with breast cancer.

## Acknowledgments

This study was funded by a research project grant (FIS PI10/02749) from the Health Institute Carlos III and PN I+D+I 2008–2011, Madrid, Spanish Government, and from a grant of Andalusian Health Service, Junta de Andalucía (PI-0457-2010).

## References

- 1 Ries LAG, Wingo PA, Miller DS, et al. The annual report to the nation on the states of cancer, 1973–1997. *Cancer* 2000;88:2398–424.
- 2 Kushi LH, Kwan ML, Lee MM, Ambrosone CB. Lifestyle factors and survival in women with breast cancer. *J Nutr* 2007;137:236S–42S.
- 3 DeSantis C, Siegel R, Bandi P, Jemal A. Breast cancer statistics, 2011. *CA Cancer J Clin* 2011;61:409–18.
- 4 Broekx S, Den Hond E, Torfs R, et al. The costs of breast cancer prior to and following diagnosis. *Eur J Health Econ* 2011;12:311–7.
- 5 Junod B, Zahl PH, Kaplan RM, Olsen J, Greenland S. An investigation of the apparent breast cancer epidemic in France: Screening and incidence trends in birth cohorts. *BMC Cancer* 2011;11:401.
- 6 Merrill RM, Sloan A. Risk-adjusted female breast cancer incidence rates in the United States. *Cancer Epidemiol* 2012;36:137–40.
- 7 Bosetti C, Bertuccio P, Levi F, et al. The decline in breast cancer mortality in Europe: An update (to 2009). *Breast* 2012;21:77–82.
- 8 Crom DB, Hinds PS, Gattuso JS, et al. Creating the basis for a breast health program for female survivors of Hodgkin disease using a participatory research approach. *Oncol Nurs Forum* 2005;32:1131–41.
- 9 Lauridsen MC, Overgaard M, Overgaard J, Hesselø IB, Christiansen P. Shoulder disability and late symptoms following surgery for early breast cancer. *Acta Oncol* 2008;47:569–75.
- 10 Hickey OT, Nugent NF, Burke SM, et al. Persistent pain after mastectomy with reconstruction. *J Clin Anesth* 2011;23:482–8.
- 11 Smith WC, Bourne D, Squair J, Phillips DO, Chambers WA. A retrospective cohort study of post mastectomy pain syndrome. *Pain* 1999;83:91–5.
- 12 Green CR, Hart-Johnson T, Loeffler DR. Cancer-related chronic pain: Examining quality of life in diverse cancer survivors. *Cancer* 2011;117:1994–2003.
- 13 Lamino Dde A, Mota DD, Pimenta CA. Prevalence and comorbidity of pain and fatigue in women with breast cancer. *Rev Esc Enferm USP* 2011;45:508–14.
- 14 Li YY, Kong SK. Persistent pain after breast cancer surgery in a Chinese population. *Clin J Pain* 2011;27:481–5.
- 15 Andrykowski MA, Curran SL, Carpenter JS, et al. Rheumatoid symptoms following breast cancer treatment: A controlled comparison. *J Pain Symptom Manage* 1999;18:85–94.
- 16 Gottrup H, Andersen J, Arendt-Nielsen L, Jensen TS. Psychophysical examination in patients with post-mastectomy pain. *Pain* 2000;87:275–84.
- 17 Fernández-Lao C, Cantarero-Villanueva I, Fernández-de-Las-Peñas C, et al. Myofascial trigger points in neck and shoulder muscles and widespread pressure pain hyper-sensitivity in patients with post-mastectomy pain: Evidence of peripheral and central sensitization. *Clin J Pain* 2010;26:798–806.
- 18 Fernández-Lao C, Cantarero-Villanueva I, Fernández-de-Las-Peñas C, et al. Widespread mechanical pain hyper-sensitivity as a sign of central sensitization after breast cancer surgery: Comparison between mastectomy and lumpectomy. *Pain Med* 2011;12:72–8.
- 19 Simons DG, Travell J, Simons LS. Travell and Simons' Myofascial Pain and Dysfunction: The Trigger Point Manual, Vol. 1, 2nd edition. Baltimore, MD: Williams & Wilkins; 1999.
- 20 Andersen KG, Kehlet H. Persistent pain after breast cancer treatment: A critical review of risk factors and strategies for prevention. *J Pain* 2011;12:725–46.
- 21 Velthuis MJ, Agasi-Idenburg SC, Aufdemkampe G, et al. The effect of physical exercise on cancer-related fatigue during cancer treatment: A meta-analysis of randomised controlled trials. *Clin Oncol* 2010;22:208–21.

- 22 Brown JC, Huedo-Medina TB, Pescatello LS, et al. Efficacy of exercise interventions in modulating cancer-related fatigue among adult cancer survivors: A Meta-analysis. *Cancer Epidemiol Biomarkers Prev* 2011;20:123–33.
- 23 Fernández-Lao C, Cantarero-Villanueva I, Fernández-de-las-Peñas C, et al. Effectiveness of a multidimensional physical therapy program on pain, pressure hypersensitivity, and trigger points in breast cancer survivors: A Randomized controlled clinical trial. *Clin J Pain* 2012;28:113–21.
- 24 Batterham SI, Heywood S, Keating JL. Systematic review and meta-analysis comparing land and aquatic exercise for people with hip or knee arthritis on function, mobility and other health outcomes. *BMC Musculoskelet Disord* 2011;12:123.
- 25 Campion MR. *Hydrotherapy: Principles and Practice*. Oxford: Butterworth-Heinemann; 1997.
- 26 Wolfe F, Smythe HA, Yunus MB, et al. The American College of Rheumatology 1990 criteria for classification of fibromyalgia: Report of the multicenter criteria committee. *Arthritis Rheum* 1990;33:160–70.
- 27 Bijur P, Silveer W, Gallagher JE. Reliability of the visual analogue scale for measurement of acute pain. *Acad Emerg Med* 2001;8:1153–7.
- 28 Bird SB, Dickson EW. Clinically significant changes in pain along the visual analogue scale. *Ann Emerg Med* 2001;36:639–43.
- 29 Gallagher EJ, Liebman M, Bijur PE. Prospective validation of clinically important changes in pain severity measured on a visual analogue scale. *Ann Emerg Med* 2001;38:633–8.
- 30 Vanderweeen L, Oostendorp RB, Vaes P, Duquet W. Pressure algometry in manual therapy. *Man Ther* 1996;1:258–65.
- 31 Chesterson LS, Sim J, Wright CC, Foster NE. Interrater reliability of algometry in measuring pressure pain thresholds in healthy humans, using multiple raters. *Clin J Pain* 2007;23:760–6.
- 32 Gerwin RD, Shanon S, Hong CZ, Hubbard D, Gevirtz R. Interrater reliability in myofascial trigger point examination. *Pain* 1997;69:65–7.
- 33 Nelson ME, Rejeski WJ, Blair SN, et al. Physical activity and public health in older adults: Recommendation from the American College of Sports Medicine and the American Heart Association. *Med Sci Sports Exerc* 2007;39:1435–45.
- 34 Chen MJ, Fan X, Moe ST. Criterion-related validity of the Borg ratings of perceived exertion scale in healthy individuals: A meta-analysis. *J Sports Sci* 2002;20: 873–99.
- 35 Mock V, Frangakis C, Davidson NE, et al. Exercise manages fatigue during breast cancer treatment: A randomized controlled trial. *Psychooncology* 2004;14: 464–77.
- 36 Pickett M, Mock V, Ropka ME, et al. Adherence to moderate-intensity exercise during breast cancer therapy. *Cancer Pract* 2002;10:284–92.
- 37 Elosua R, Garcia M, Aguilar A, et al. Validation of the Minnesota Leisure Time Physical Activity Questionnaire in Spanish women. Investigators of the MARATDON Group. *Med Sci Sports Exerc* 2000;32:1431–7.
- 38 Cohen J. *Statistical Power Analysis for the Behavioural Sciences*. Hillsdale, NJ: Lawrence Erlbaum Associates; 1988.
- 39 Borneman T, Piper BF, Sun VC, Koczywas M, Uman G, Ferrell B. Implementing the Fatigue Guidelines at one NCCN member institution: Process and outcomes. *J Natl Compr Canc Netw* 2007;5:1092–101.
- 40 Gärtner R, Jensen MB, Nielsen J, et al. Prevalence of and factors associated with persistent pain following breast cancer surgery. *JAMA* 2009;302:1985–92.
- 41 Koltyn KF. Exercise-induced hypoalgesia and intensity of exercise. *Sports Med* 2002;32:477–87.
- 42 Hoffman MD, Shepanski MA, Ruble SB, et al. Intensity and duration threshold for aerobic exercise-induced analgesia to pressure pain. *Arch Phys Med Rehabil* 2004;85:1183–7.
- 43 Torres-Lacomba M, Mayoral-del-Moral O, Coperias-Zazo JL, Gerwin RD, Goñi AZ. Incidence of myofascial pain syndrome in breast cancer surgery: A prospective study. *Clin J Pain* 2010;26:320–5.
